# Supplementary material for: Bioelectrochemically enhanced autotrophic Feammox for ammonium removal via the Fe(ii)/Fe(iii) cycle
Source: Royal Society of Chemistry journal article supplement (doi:10.1039/d4ew00074a), 2024-01-01
Supplement: d4ew00074a1.pdf [file d4ew00074a1.pdf]

## Supplementary Information

### **Bioelectrochemically Enhanced Autotrophic Feammox for Ammonium Removal via Fe(II)/Fe(III) Cycle**

Tuo Wang<sup>1</sup>, Jiayao Zhang<sup>1</sup>, Ziyuan Wang<sup>1</sup>, Qian Zhao<sup>1</sup>, Yue Wu<sup>1</sup>, Nan Li<sup>2</sup>, Xinlei Jiang<sup>3\*</sup>, Xin Wang<sup>1\*</sup>

<sup>1</sup> MOE Key Laboratory of Pollution Processes and Environmental Criteria / Tianjin Engineering Center of Environmental Diagnosis and Contamination Remediation, Nankai University, No. 38 Tongyan Road, Jinnan District, Tianjin 300350, China

<sup>2</sup> School of Environmental Science and Engineering, Tianjin University, No. 92 Weijin Road, Nankai District, Tianjin 300072, China

<sup>3</sup> School of Environmental and Municipal Engineering, Tianjin Chengjian University, Tianjin 300384, P. R. China

\* Corresponding authors: Phone: (86)18722292585; Fax: (86)22-23501117; E-mail:

[xinwang1@nankai.edu.cn](mailto:xinwang1@nankai.edu.cn) (X. Wang), [jiangxinlei5586@126.com](mailto:jiangxinlei5586@126.com) (X. Jiang)

**Figure**

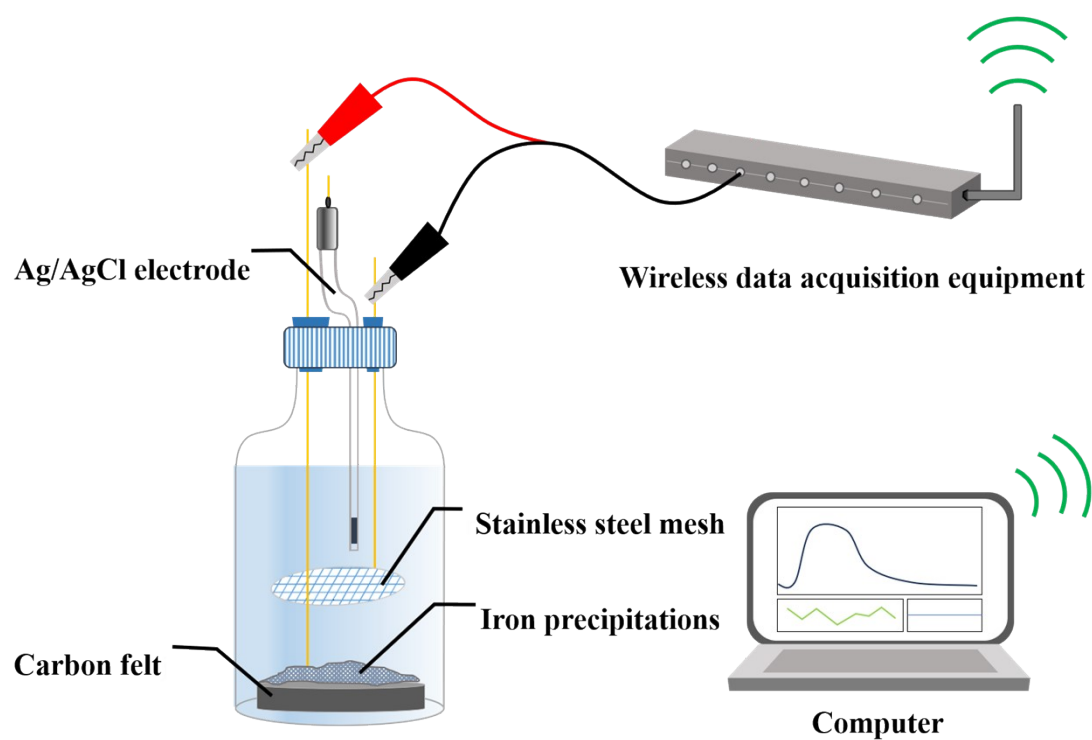

**Figure S1.** The schematic diagram of the experimental setup.

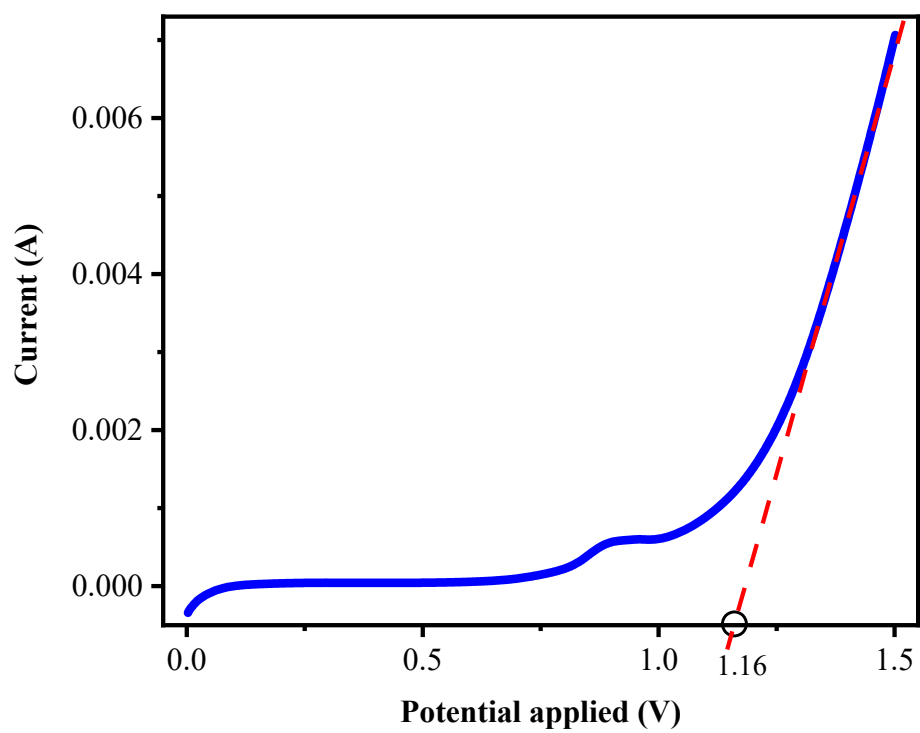

**Figure S2.** The linear sweep voltammetry curve of carbon felt.

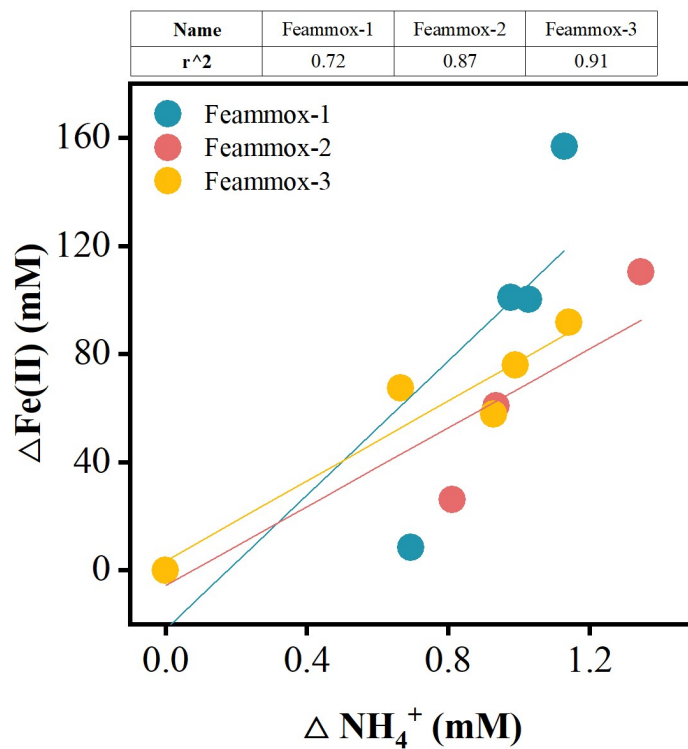

**Figure S3.** The linear relationship between the increment of Fe (II) and the amount of ammonium oxidation in the Feammox inoculant.

## Table

**Table S1.**

The quantity of Coulomb generated by ammonium oxidation to various products under different voltages.

|                                                    | <b>0.2 V</b> | <b>0.6 V</b> | <b>1.0 V</b> |
|----------------------------------------------------|--------------|--------------|--------------|
| <b>NO<sub>2</sub><sup>-</sup> (6e<sup>-</sup>)</b> | 74           | 139          | 93           |
| <b>NO<sub>3</sub><sup>-</sup> (8e<sup>-</sup>)</b> | 6.2          | 6.2          | 6.2          |
| <b>N<sub>2</sub> (3e<sup>-</sup>)</b>              | 28           | 12           | 21           |

**Table S2.**

Alpha diversity index of the bacteria in the different MECs.

| <b>Samples</b> | <b>ACE</b> | <b>Chao1</b> | <b>Simpson</b> | <b>Shannon</b> | <b>Coverage</b> |
|----------------|------------|--------------|----------------|----------------|-----------------|
| <b>ck-bio</b>  | 847.1727   | 847          | 0.9622         | 6.9072         | 1               |
| <b>0.2</b>     | 752.759    | 755          | 0.982          | 7.164          | 0.9999          |
| <b>0.6</b>     | 801.703    | 802.2        | 0.948          | 6.2629         | 0.9999          |
| <b>1.0</b>     | 885.273    | 888.2        | 0.9826         | 7.3335         | 0.9999          |
